# Supplementary material for: BRCA1 inhibits AR–mediated proliferation of breast cancer cells through the activation of SIRT1
Source: PubMed Central journal article supplement (PMC4763204; doi:10.1038/srep22034), 2016-02-23
Supplement: srep22034-s1.pdf [file srep22034-s1.pdf]

# **BRCA1 inhibits AR–mediated proliferation of breast cancer cells through the activation of SIRT1**

Wenwen Zhang<sup>1</sup>, Jiayan Luo<sup>1</sup>, Fang Yang<sup>1</sup>, Yucai Wang<sup>2</sup>, Yongmei Yin<sup>3</sup>, Anders Strom<sup>4</sup>, Jan Åke Gustafsson<sup>4</sup> and Xiaoxiang Guan<sup>1</sup>

<sup>1</sup>Department of Medical Oncology, Jinling Hospital, Medical School of Nanjing University, Nanjing 210002, China;

<sup>2</sup>Department of Medicine, Rutgers New Jersey Medical School, Newark, NJ 07103, USA;

<sup>3</sup>Department of Oncology, The First Affiliated Hospital of Nanjing Medical University, Nanjing 210029, China;

<sup>4</sup>Department of Biology and Biochemistry, Center for Nuclear Receptors and Cell Signaling, University of Houston, Houston, TX 77204, USA.

Correspondence and requests for materials should be addressed to X. G. (e-mail: [xguan@nju.edu.cn](mailto:xguan@nju.edu.cn)) or J. G. (e-mail: [jgustafsson@uh.edu](mailto:jgustafsson@uh.edu))

## Figure Legends

**Figure S1.** Expression of SIRT1, mTOR and Skp2 in human breast cancers. (A) Relative levels of mTOR and Skp2 mRNA in 62 breast cancers with no BRCA1 mutation compared with 20 breast cancers with a BRCA1 mutation. (B) Relative levels of SIRT1 and Skp2 mRNA in 97 breast cancer tissue samples with no BRCA1 mutation and 18 breast cancer tissue samples with a BRCA1 mutation. Data analyzed using Oncomine ([www.oncomine.org](http://www.oncomine.org)) from original published data (Waddell et al., 2010) (A), and (van 't Veer et al., 2002) (B).

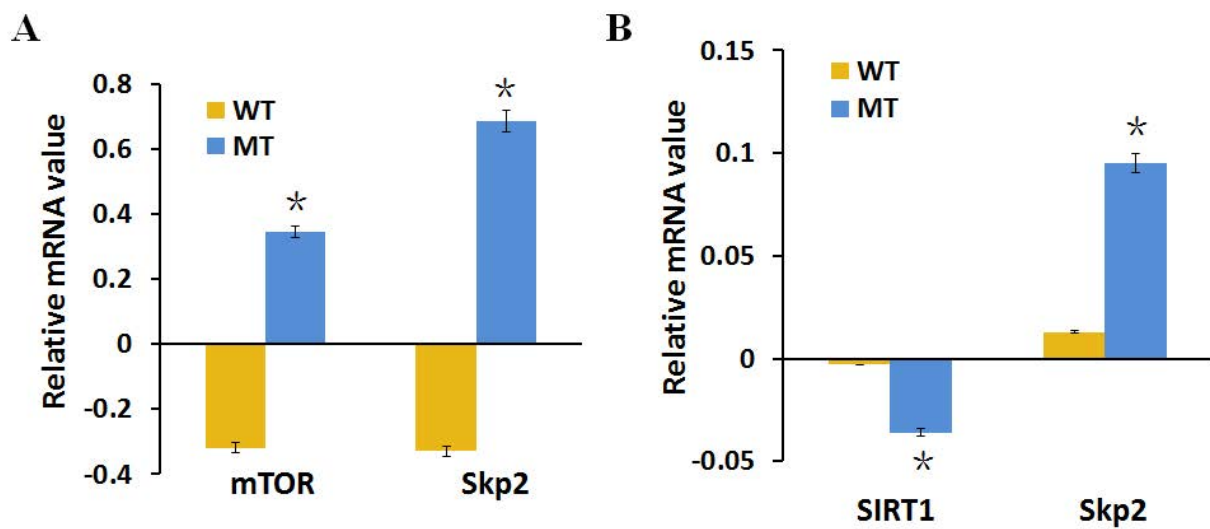

**Table S1:** Relationship between expression of BRCA1, AR, SIRT1 and clinicopathologic characteristics of breast cancer patients

| Variables | BRCA1 high (n=97) |      | BRCA1 low (n=52) |      | P-value | AR high (n=67) |       | AR low (n=82) |      | P-value | SIRT1 high (n=68) |      | SIRT1 low (n=81) |      | P-value       |
|-----------|-------------------|------|------------------|------|---------|----------------|-------|---------------|------|---------|-------------------|------|------------------|------|---------------|
|           | No.               | %    | No.              | %    |         | No.            | %     | No.           | %    |         | No.               | %    | No.              | %    |               |
|           | Age               |      |                  |      |         |                | 0.952 |               |      |         |                   |      | 0.120            |      |               |
| ≤57 years | 49                | 50.5 | 26               | 50.0 |         | 29             | 43.3  | 46            | 56.1 |         | 27                | 39.7 | 48               | 59.3 |               |
| >57 years | 48                | 49.5 | 26               | 50.0 |         | 38             | 56.7  | 36            | 43.9 |         | 41                | 60.3 | 33               | 40.7 |               |
| T stage   |                   |      |                  |      | 0.442   |                |       |               |      | 0.562   |                   |      |                  |      | 0.292         |
| T1        | 22                | 22.7 | 16               | 30.8 |         | 16             | 23.9  | 22            | 26.8 |         | 15                | 22.1 | 23               | 28.4 |               |
| T2        | 58                | 59.8 | 31               | 59.6 |         | 42             | 62.7  | 47            | 57.3 |         | 45                | 66.2 | 44               | 54.3 |               |
| T3        | 12                | 12.4 | 3                | 5.8  |         | 5              | 7.5   | 10            | 12.2 |         | 5                 | 7.4  | 10               | 12.3 |               |
| T4        | 1                 | 1.0  | 1                | 1.9  |         | 0              | 0     | 2             | 2.4  |         | 0                 | 0    | 2                | 2.5  |               |
| NA*       | 4                 | 4.1  | 1                | 1.9  |         | 4              | 6.0   | 1             | 1.2  |         | 3                 | 4.4  | 2                | 2.5  |               |
| N stage   |                   |      |                  |      | 0.168   |                |       |               |      | 0.867   |                   |      |                  |      | <b>0.003*</b> |
| N0        | 51                | 52.6 | 27               | 51.9 |         | 34             | 50.7  | 44            | 53.7 |         | 43                | 63.2 | 35               | 43.2 |               |
| N1        | 27                | 27.8 | 10               | 19.2 |         | 18             | 26.9  | 19            | 23.2 |         | 17                | 25.0 | 20               | 24.7 |               |
| N2        | 12                | 12.4 | 7                | 13.5 |         | 7              | 10.4  | 12            | 14.6 |         | 5                 | 7.4  | 14               | 17.3 |               |
| N3        | 5                 | 5.2  | 8                | 15.4 |         | 6              | 9.0   | 7             | 8.5  |         | 1                 | 1.5  | 12               | 14.8 |               |
| NA*       | 2                 | 2.1  | 0                | 0    |         | 2              | 3.0   | 0             | 0    |         | 2                 | 2.9  | 0                | 0    |               |

\*NA: Not Available; All patients were M0 stage.

**Table S2:** Correlative analysis of the AR expression with BRCA1 at tumor microarray

|               | Tumor microarray (n=149) |                 |
|---------------|--------------------------|-----------------|
|               | BRCA1(Positive)          | BRCA1(Negative) |
| AR (Positive) | 36                       | 31              |
| AR (Negative) | 61                       | 21              |
| <i>r</i>      |                          | <b>-0.216</b>   |
| <i>P</i>      |                          | <b>0.008</b>    |

**Table S3:** Correlative analysis of the SIRT1 expression with BRCA1 at tumor microarray

|                  | Tumor microarray (n=149) |                   |
|------------------|--------------------------|-------------------|
|                  | BRCA1(Positive)          | BRCA1(Negative)   |
| SIRT1 (Positive) | 63                       | 5                 |
| SIRT1 (Negative) | 34                       | 47                |
| <i>r</i>         |                          | <b>0.530</b>      |
| <i>P</i>         |                          | <b>&lt; 0.001</b> |

Supplementary Table S4: Target sequences for siRNA

| <b>Gene</b>      | <b>Target sequences</b>      |
|------------------|------------------------------|
| <b>siSIRT1-1</b> | 5'- GATGAAGTTGACCTCCTCA-3'   |
| <b>siSIRT1-2</b> | 5'- CTTGTACGACGAAGACGA-3'    |
| <b>siBRCA1-1</b> | 5'- AAGCTCCTCTCACTCTTCAGT-3' |
| <b>siBRCA1-2</b> | 5'- CAGCTACCCTTCCATCATA-3'   |
